# Supplementary material for: Surgical Approach to Liver Metastases in GEP-NET in a Tertiary Reference Center
Source: MDPI journal article supplement (doi:10.3390/cancers15072048), 2023-03-29
Supplement: s1 [file s1]

**Supplementary Table S1.** Characteristics of patients who underwent liver-directed surgery for NELM according to surgical approach.

|                                                |                 | <b>MILS<br/>(n = 13)</b> | <b>OLS<br/>(n = 39)</b> | <b>p</b>     |
|------------------------------------------------|-----------------|--------------------------|-------------------------|--------------|
| Gender <sup>1</sup>                            | Female          | 6 (46%)                  | 24 (62%)                | 0.331        |
|                                                | Male            | 7 (54%)                  | 15 (38%)                |              |
| Age (years) <sup>2</sup>                       |                 | 57 (46 – 73)             | 60 (21 – 80)            | 0.664        |
| BMI (kg/m <sup>2</sup> ) <sup>2</sup>          |                 | 25 (20 – 36)             | 25 (19 – 34)            | 0.715        |
| ASA <sup>1</sup>                               | 2               | 5 (38%)                  | 27 (69%)                | <b>0.048</b> |
|                                                | 3               | 8 (62%)                  | 12 (31%)                |              |
| Localization of primary <sup>1</sup>           | Pancreas        | 6 (46%)                  | 17 (44%)                | 0.872        |
|                                                | Small intestine | 7 (54%)                  | 22 (56%)                |              |
| Appearance of metastases <sup>1</sup>          | Synchronous     | 10 (77%)                 | 28 (72%)                | 0.718        |
|                                                | Metachronous    | 3 (23%)                  | 11 (28%)                |              |
| Indication <sup>1</sup>                        | Curative        | 5 (38%)                  | 17 (44%)                | 0.746        |
|                                                | Debulking       | 8 (62%)                  | 22 (56%)                |              |
| Duration of surgery (minutes) <sup>2</sup>     |                 | 285 (130 – 504)          | 265 (90 – 575)          | 0.767        |
| Extent of surgery <sup>1</sup>                 | Major resection | 3 (23%)                  | 14 (36%)                | 0.636        |
|                                                | Minor resection | 10 (77%)                 | 25 (64%)                |              |
| Simultaneous resection of primary <sup>1</sup> |                 | 4 (31%)                  | 19 (49%)                | 0.259        |
| ICU <sup>1</sup>                               |                 | 11 (85%)                 | 33 (85%)                | 1.0          |
| Length of ICU stay <sup>2</sup>                |                 | 1 (0 – 6)                | 1 (0 – 35)              | 0.702        |
| Length of hospital stay <sup>2</sup>           |                 | 10 (7 – 20)              | 12 (6 – 132)            | 0.100        |
| 90-day complications <sup>1</sup>              |                 | 6 (46%)                  | 18 (46%)                | 1.0          |

|                                             |    |          |           |       |
|---------------------------------------------|----|----------|-----------|-------|
| 90-day major complications <sup>1</sup>     |    | 5 (38%)  | 15 (38%)  | 1.0   |
| 90-day mortality <sup>1</sup>               |    | 0 (0%)   | 0 (0.0%)  | 1.0   |
| Resection of primary <sup>1</sup>           |    | 12 (92%) | 39 (100%) | 0.080 |
| Grading primary <sup>1</sup>                | G1 | 4 (31%)  | 14 (36%)  | 0.214 |
|                                             | G2 | 8 (61%)  | 25 (64%)  |       |
|                                             | G3 | 1 (8%)   | 0 (0%)    |       |
| Grading hepatic metastases <sup>1</sup>     | G1 | 4 (31%)  | 15 (38%)  | 0.813 |
|                                             | G2 | 8 (61%)  | 20 (52%)  |       |
|                                             | G3 | 1 (8%)   | 4 (10%)   |       |
| R status <sup>1</sup>                       | R0 | 4 (31%)  | 17 (44%)  | 0.179 |
|                                             | R1 | 1 (8%)   | 0 (0%)    |       |
|                                             | R2 | 8 (61%)  | 22 (56%)  |       |
| Neoadjuvant therapy <sup>1</sup>            |    | 3 (23%)  | 19 (49%)  | 0.143 |
| Adjuvant therapy <sup>1</sup>               |    | 11 (85%) | 30 (77%)  | 0.678 |
| >1 adjuvant therapy modalities <sup>1</sup> |    | 6 (46%)  | 20 (51%)  | 0.749 |
| >2 adjuvant therapy modalities <sup>1</sup> |    | 3 (23%)  | 12 (31%)  | 0.596 |

<sup>1</sup> Count (percentage); <sup>2</sup> Median (range); NELM, neuroendocrine liver metastases; MILS, Minimally invasive liver surgery; OLS, open liver surgery; BMI, Body Mass Index; ASA, American Society of Anesthesiologists; ICU, Intensive Care Unit

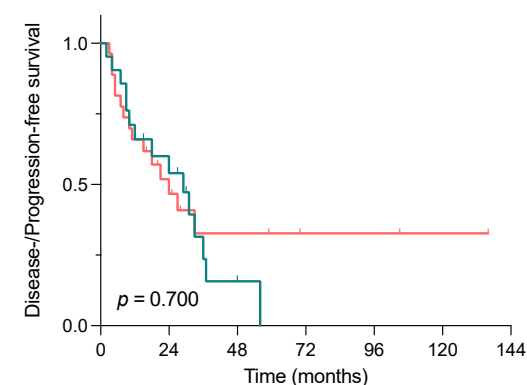

|                |    |    |   |   |   |   |   |
|----------------|----|----|---|---|---|---|---|
| Number at risk |    |    |   |   |   |   |   |
| siNET          | 29 | 10 | 4 | 2 | 2 | 1 | 0 |
| pNET           | 23 | 10 | 2 | 0 | 0 | 0 | 0 |

(a)

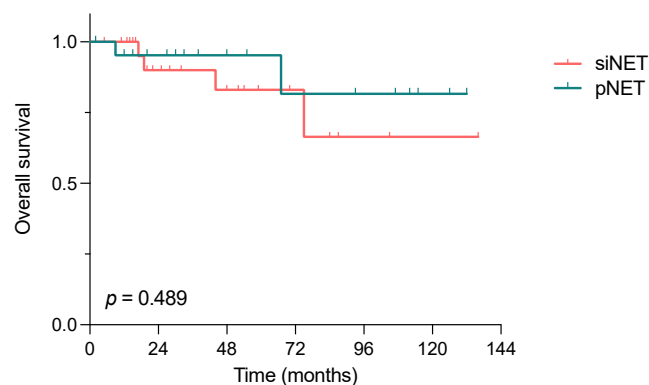

|                |    |    |    |   |   |   |   |
|----------------|----|----|----|---|---|---|---|
| Number at risk |    |    |    |   |   |   |   |
| siNET          | 29 | 16 | 11 | 5 | 2 | 1 | 0 |
| pNET           | 23 | 15 | 9  | 6 | 5 | 2 | 0 |

(b)

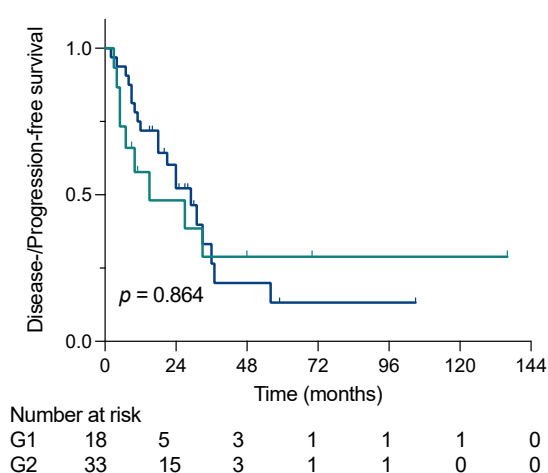

(c)

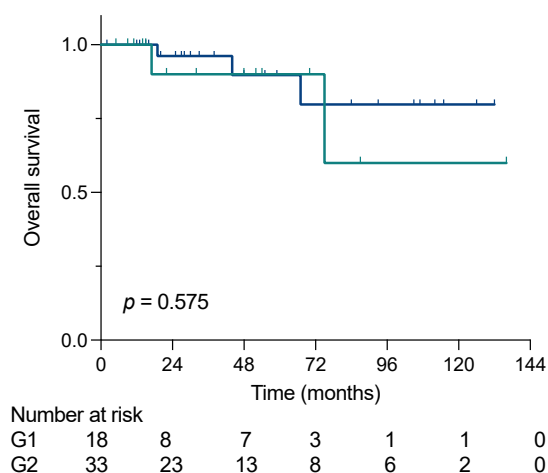

(d)

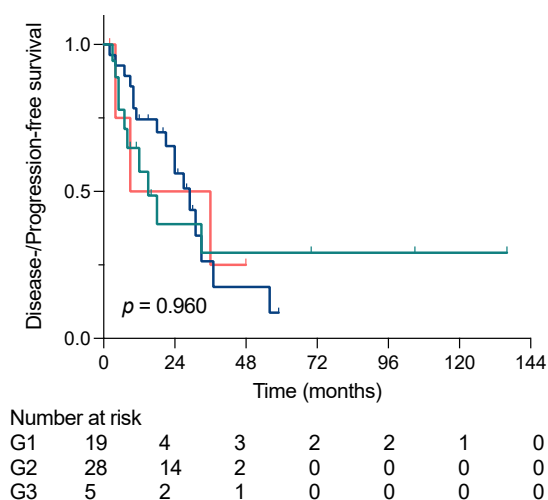

(e)

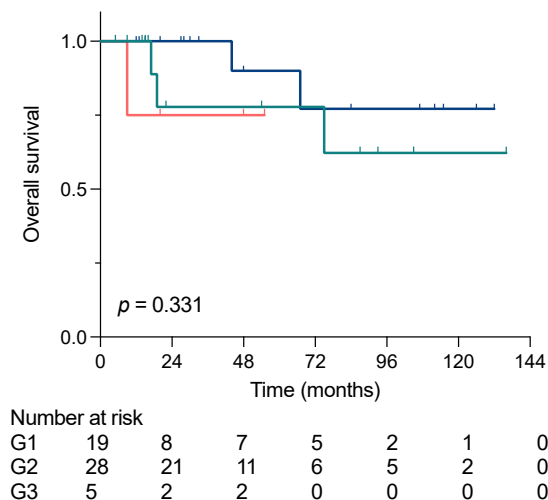

(f)

**Supplementary Figure S1.** Disease / Progression free and overall survival according to primary tumor site, grading of primary tumor and hepatic metastases. Different primary tumor sites did not show significant differences in (a) DFS / PFS nor (b) OS; (c) DFS / PFS and (d) OS did not differ significantly between primary tumor gradings focusing on G1 and G2 tumors; Different gradings of hepatic metastases had no significant effect on (e) DFS / PFS nor (f) OS. Survival analyses were performed using Kaplan-Meier method.
